# Supplementary material for: Evaluating Air Pollution in Two Urban Alleys and Comparing Tree Capacity for PM Dust Absorption: A Case Study
Source: Research Square preprint supplement (doi:10.21203/rs.3.rs-5461393/v1), 2025-04-14
Supplement: Supplementary file 1 [file 768462551e2aa3e17f3a948b.docx]

Table 1. Average tree growth parameters

| **Measured parameter** | DBH [cm] | | Total Tree Height [m] | | Crown Width NS [m] | | Crown Width EW [m] | | Crown Miss [%] | |
| --- | --- | --- | --- | --- | --- | --- | --- | --- | --- | --- |
| **Street name** | Marszałkowska | Żwirki i Wigury | Marszałkowska | Żwirki i Wigury | Marszałkowska | Żwirki i Wigury | Marszałkowska | Żwirki i Wigury | Marszałkowska | Żwirki i Wigury |
| **Value (with Standard Error)** | 18,05±11,43 | 38,82±9.72 | 5,18±2,40 | 11,17±2,34 | 3,42±2,05 | 7,71±2,10 | 3,18±2,16 | 7,78±2,21 | 18,22±22,75 | 12,89±15,97 |
