# Supplementary material for: Evaluating Air Pollution in Two Urban Alleys and Comparing Tree Capacity for PM Dust Absorption: A Case Study
Source: Research Square preprint supplement (doi:10.21203/rs.3.rs-5461393/v1), 2025-04-14
Supplement: Supplementary file 2 [file aad476cdd19d3553a0ccaedc.docx]

Table 3. Measurement of pollution levels at ul. Żwirki i Wigury

| **Żwirki i Wigury Street** | | | | | | | | | | | | |
| --- | --- | --- | --- | --- | --- | --- | --- | --- | --- | --- | --- | --- |
| Date | | Time of recorded pollution levels lower than 15 µg/m3 [in minutes] | | | | | Time of recorded pollution levels higher than 15 µg/m3 [in minutes] | | | | | |
|  |
|  | | After the peak traffic | High traffic | | Total | | After the peak traffic | | High traffic | | Total | |  |
| 24.09.2021 | | 66 | 64 | | 126 | | 2 | | 0 | | 2 | |  |
| 27.09.2021 | | 63 | 61 | | 124 | | 0 | | 0 | | 0 | |  |
| 28.09.2021 | | 66 | 65 | | 131 | | 0 | | 0 | | 0 | |  |
| 29.09.2021 | | 62 | 62 | | 124 | | 0 | | 1 | | 1 | |  |
| 30.09.2021 | | 0 | 0 | | 0 | | 65 | | 63 | | 128 | |  |
| 01.10.2021 | | 0 | 58 | | 58 | | 66 | | 8 | | 74 | |  |
| 04.10.2021 | | 65 | 65 | | 130 | | 0 | | 0 | | 0 | |  |
| 05.10.2021 | | 60 | 66 | | 126 | | 8 | | 0 | | 8 | |  |
| 06.10.2021 | | 66 | 65 | | 131 | | 0 | | 0 | | 0 | |  |
| Average (with Standard Error) | | 49,78±  28,30 | 56,22±  21,24 | | 105,56±  45,84 | | 15,67±  28,37 | | 8,00±  20,79 | | 23,67±  45,95 | |  |
|  | |  | | |  | |  | |  | |  | |
