# Supplementary material for: Evaluating Air Pollution in Two Urban Alleys and Comparing Tree Capacity for PM Dust Absorption: A Case Study
Source: Research Square preprint supplement (doi:10.21203/rs.3.rs-5461393/v1), 2025-04-14
Supplement: Supplementary file 3 [file caf4f31bc52f4fac6245afcf.docx]

Table 2. Measurement of pollution levels at Marszałkowska Street

| **Marszałkowska Street** | | | | | | |
| --- | --- | --- | --- | --- | --- | --- |
| Date | Time of recorded pollution levels lower than 15 µg/m3 [in minutes] | | | Time of recorded pollution levels higher than 15 µg/m3 [in minutes] | | |
|  |
|  | After the peak traffic | High traffic | Total | After the peak traffic | High traffic | Total |  |
| 24.09.2021 | 14 | 22 | 36 | 40 | 32 | 72 |  |
| 27.09.2021 | 35 | 83 | 118 | 17 | 2 | 19 |  |
| 28.09.2021 | 0 | 52 | 52 | 60 | 5 | 65 |  |
| 29.09.2021 | 0 | 49 | 49 | 60 | 10 | 70 |  |
| 30.09.2021 | 48 | 5 | 53 | 8 | 50 | 58 |  |
| 01.10.2021 | 16 | 32 | 48 | 34 | 20 | 54 |  |
| 04.10.2021 | 63 | 33 | 96 | 9 | 20 | 29 |  |
| 05.10.2021 | 3 | 56 | 59 | 43 | 2 | 45 |  |
| 06.10.2021 | 3 | 52 | 55 | 44 | 12 | 66 |  |
| Average (with Standard Error) | 20,22±  23,15 | 42,67±  22,56 | 62,89±  26,37 | 35,00±  19,84 | 17,00±  15,81 | 53,11±  18,66 |  |
